# Supplementary material
Source: PubMed Central journal article supplement (PMC3719604)
Supplement: JCM.00657-13_zjm999092705so1.pdf [file JCM.00657-13_zjm999092705so1.pdf]

| Study                 | Type of PCR                                                                                                   | Primers                                                                                                                                                                              | Identified microorganisms                                                                                                                                                                                                                                                                                           |
|-----------------------|---------------------------------------------------------------------------------------------------------------|--------------------------------------------------------------------------------------------------------------------------------------------------------------------------------------|---------------------------------------------------------------------------------------------------------------------------------------------------------------------------------------------------------------------------------------------------------------------------------------------------------------------|
| Portillo et al, 2012  | Real-time multiplex PCR (SeptiFasta, Roche Diagnostics)                                                       | NA                                                                                                                                                                                   | <i>Escherichia coli</i><br><i>Enterobacter spp.</i><br><i>Klebsiella spp.</i><br><i>Proteus spp.</i><br><i>Coagulase-negative staphylococci</i><br><i>S. aureus</i><br><i>Enterococcus spp.</i><br><i>P. acnes</i>                                                                                                  |
| Marín et al, 2012     | 16S rRNA gene was amplified using conventional PCR. GeneAmp PCR system 9700 (Applied Biosystems Inc.)         | fD1 (forward, 5=-AGAGTTTGATCCTGGCTCAG-3=)<br>rP2 (reverse, 5=-ACGGCTACCTTGTTACGACTT-3=)<br>GloF (forward, 5=-GAAGAGCCAAGGACAGGTAC-3=)<br>GloR (reverse, 5=-GGAAAATAGACCAATAGGCAG-3=) | <i>S. aureus</i><br><i>CoNSa/Staphylococcus epidermidis</i><br><i>Enterococcus faecalis</i><br><i>Streptococcus agalactiae</i><br><i>Streptococcus viridans</i><br><i>Escherichia coli</i><br><i>Proteus mirabilis</i><br><i>Pseudomonas aeruginosa</i><br><i>Propionibacterium acnes</i><br><i>Other anaerobes</i> |
| Jacovides et al, 2012 | Deep 16S rRNA gene sequencing with use of a sequencing system from 454 Life Sciences (Branford, Connecticut). | NA                                                                                                                                                                                   | <i>Acinetobacter</i><br><i>Campylobacter</i><br><i>Candida</i><br><i>Cladosporium</i><br><i>Corynebacterium</i><br><i>Enterococcus</i><br><i>Klebsiella</i><br><i>Mycoplasma</i><br><i>Peptostreptococcus</i>                                                                                                       |

|                     |                                                                                                                                                                               |                                                                                                                                          |                                                                                                                                                                                                                                                                                                                                                                       |
|---------------------|-------------------------------------------------------------------------------------------------------------------------------------------------------------------------------|------------------------------------------------------------------------------------------------------------------------------------------|-----------------------------------------------------------------------------------------------------------------------------------------------------------------------------------------------------------------------------------------------------------------------------------------------------------------------------------------------------------------------|
|                     |                                                                                                                                                                               |                                                                                                                                          | <i>Propionibacterium</i><br><i>Pseudomonas</i><br><i>Staphylococcus</i><br><i>Streptococcus</i><br><i>Treponema</i><br><i>Other</i>                                                                                                                                                                                                                                   |
| Gomez et al, 2012   | 16S rRNA gene real-time PCR using the LightCycler 2.0 instrument (Roche Molecular Diagnostics, Indianapolis, IN)                                                              | 16S rRNA gene V3-V4 region(forward- 5'-CGG-CCC-AGA-CTC-CTA-CGG-GAG-GCA140 GCA-3' and reverse - 5'-GCG-TGG-ACT-ACC-AGG-GTA-TCT-AAT-CC-3') | <i>Streptococcus sp</i><br>CNS<br><i>Enterococcus sp.</i><br><i>Pseudomonas sp.</i><br><i>F. magna</i><br><i>P. acnes</i><br><i>S.aureus</i><br><i>P. melaninogenica</i><br><i>Corynebacterium sp.</i><br><i>Pandoraea norinbergensis</i><br><i>E. faecalis</i><br><i>Staphylococcus lugdunensis</i><br><i>Actinomyces neuui</i><br>GPB<br><i>Serratia marcescens</i> |
| Esteban et al, 2012 | PCR-based amplification of a fragment from the 16 rRNA gene using the GenoType commercial system BC Grampositive and BC Gramnegative (Hain Lifescience GmbH, Nehren, Germany) | NA                                                                                                                                       | <i>S. aureus</i><br><i>S. epidermidis</i><br><i>S. warneri</i><br><i>S. hominis</i><br><i>S. lugdunensis</i><br><i>S. pyogenes</i><br><i>M. abscessus</i><br><i>E. aerogenes</i><br><i>B. fragilis</i>                                                                                                                                                                |

|                    |                                                                                                                                                                                                  |                                                                                                                                                                                                                                                                                                                                                                                                                                               |                                                                                                                                                                                                                                                                                                                                                                                                                                                                                                                                   |
|--------------------|--------------------------------------------------------------------------------------------------------------------------------------------------------------------------------------------------|-----------------------------------------------------------------------------------------------------------------------------------------------------------------------------------------------------------------------------------------------------------------------------------------------------------------------------------------------------------------------------------------------------------------------------------------------|-----------------------------------------------------------------------------------------------------------------------------------------------------------------------------------------------------------------------------------------------------------------------------------------------------------------------------------------------------------------------------------------------------------------------------------------------------------------------------------------------------------------------------------|
|                    |                                                                                                                                                                                                  |                                                                                                                                                                                                                                                                                                                                                                                                                                               | <i>P. acnes</i><br><i>P. aeruginosa</i><br><i>K. pneumoniae</i><br><i>E. coli</i><br><i>R. picketti</i><br><i>Burkholderia sp.</i><br><i>S. maltophilia</i><br><i>Pasteurella sp.</i><br><i>Prevotella sp.</i><br><i>Candida sp.</i><br><i>A. terreus</i>                                                                                                                                                                                                                                                                         |
| Bergin et al, 2010 | Conserved 16S rRNA primers were used as a universal screen for bacterial infection and iScript one-step RT-PCR Kit with SYBR Green on an iCycler Thermal Cycler (Bio-Rad, Hercules, California). | 387-base-pair segment(forward 5'-ATTAGATACCCTGGTAGTCCACGCC- 3' and reverse 5'-CGTCATCCCCACCTTCCTCC-3')<br>Group-A Streptococcus (forward 5'-AATACCGCATAAGAGAGACTAACG-3' and reverse 5'-CTCGCTAGAGTGCCCAACTTA-3')<br>Group-B Streptococcus ((forward 5'-CTTTCTCTTCGGAGCAGAA-3' and reverse 5'-CTCGCTAGAGTGCCCAACTTA-3')<br>Alpha-hemolytic Streptococcus (forward 5'-GTGAGAGTGGAAAGTTCACACTGT-3' and reverse 5'-AGCCTTTAACTTCAGACTTATCTAAC-3') | <i>Staphylococcus aureus</i><br>Methicillin-resistant<br><i>Staphylococcus aureus</i><br><i>Staphylococcus epidermidis</i><br><i>Staphylococcus saprophyticus</i><br><i>Listeria monocytogenes</i><br><i>Enterococcus faecalis</i><br><i>Streptococcus pneumoniae</i><br><i>Streptococcus pyogenes</i><br><i>Streptococcus agalactiae</i><br><i>Streptococcus oralis</i><br><i>Escherichia coli</i><br><i>Citrobacter freundii</i><br><i>Proteus mirabilis</i><br><i>Pseudomonas aeruginosa</i><br><i>Acinetobacter baumannii</i> |
| Piper et al, 2009, | <i>Staphylococcal</i> and <i>P. acnes</i> rapid-cycle real-time LightCycler PCR.                                                                                                                 | <i>Staphylococcal</i> : targeting tuf<br><i>P. acnes</i> : PArA-1 (5'-AAGCG                                                                                                                                                                                                                                                                                                                                                                   | <i>Staphylococcal</i><br><i>P. acnes</i>                                                                                                                                                                                                                                                                                                                                                                                                                                                                                          |

|                       |                                                                                                                                                                                                                                                                  |                                                                                                                                                                               |                                                                                                                                                                              |
|-----------------------|------------------------------------------------------------------------------------------------------------------------------------------------------------------------------------------------------------------------------------------------------------------|-------------------------------------------------------------------------------------------------------------------------------------------------------------------------------|------------------------------------------------------------------------------------------------------------------------------------------------------------------------------|
|                       |                                                                                                                                                                                                                                                                  | TGAGTGACGGTAATGGGTA-3' and PArA-2 (5'-CCACCATAACGTGCTGGCAACAGT-3')                                                                                                            |                                                                                                                                                                              |
| Kobayashi et al, 2009 | RT-PCR using the LightCycler system (Roche Diagnostics, Mannheim, Germany). Methicillin-resistant <i>Staphylococcus aureus</i> -specific detection kit (Roche Diagnostics) and broad range detection by universal PCR that targeted a part of the 16S rRNA gene. | NA                                                                                                                                                                            | <i>Methicillin-resistant Staphylococcus aureus</i><br><i>Staphylococcus epidermidis</i><br><i>Escherichia coli</i>                                                           |
| Kobayashi et al, 2008 | Universal PCR                                                                                                                                                                                                                                                    | <i>Staphylococcus</i> : regions of the <i>tuf</i> gene;<br><i>S. aureus</i> : (5'-GGCGATGCTCAATACGAAGAAAAA TC-FITC-3' and 5'-LCRed705-AGA ATCAATGGAAGCTGTAGATAC-phosphate-3') | <i>Staphylococcal P. acnes</i>                                                                                                                                               |
| Gallo et al, 2008     | PCR assay targeting the 16S rDNA gene                                                                                                                                                                                                                            | (forward primer RW01: 5' AACTGGAGGAAGGTGGGGAT 3'; reverse primer DG74: 5' TGCGGTTGGATCACCTCCT 3')                                                                             | <i>Staphylococcal P. acnes</i>                                                                                                                                               |
| Moojen et al, 2007    | PCR of the 16S rRNA Gene                                                                                                                                                                                                                                         | NA                                                                                                                                                                            | NA                                                                                                                                                                           |
| Panousis et al, 2005  | PCR of the 16S rRNA Gene                                                                                                                                                                                                                                         | NA                                                                                                                                                                            | <i>Staphylococcus</i><br><i>Streptococcus viridans</i><br><i>Streptococcus mitis</i><br><i>Streptococcus</i><br><i>Candida</i><br><i>Enterococcus</i><br><i>Diphtheroids</i> |
| Tunney et al, 1999    | PCR of the 16S rRNA Gene                                                                                                                                                                                                                                         | D1(5'-GAGGAAGGTRGGGAYGACGT)<br>D2 (5'-AGGCCC GGGAACGYATTYACCG)                                                                                                                | <i>S. capitis</i><br><i>S. epidermidis</i><br><i>Staphylococcus haemolyticus</i><br><i>P. acnes</i><br><i>Micrococcus agilis</i>                                             |

|                        |                          |                                                                     |                                                                       |
|------------------------|--------------------------|---------------------------------------------------------------------|-----------------------------------------------------------------------|
|                        |                          |                                                                     | <i>B. fragilis</i><br><i>E. coli</i><br><i>Peptostreptococcus sp.</i> |
| Mariani et al,<br>1996 | PCR of the 16S rRNA Gene | 5' was CGGCAGGCCTAACACATGCAAGTCG; 3' was<br>GGTTGCGGCCGTACTCCCCAGG. | NA                                                                    |

**Table S1** The information of PCR.

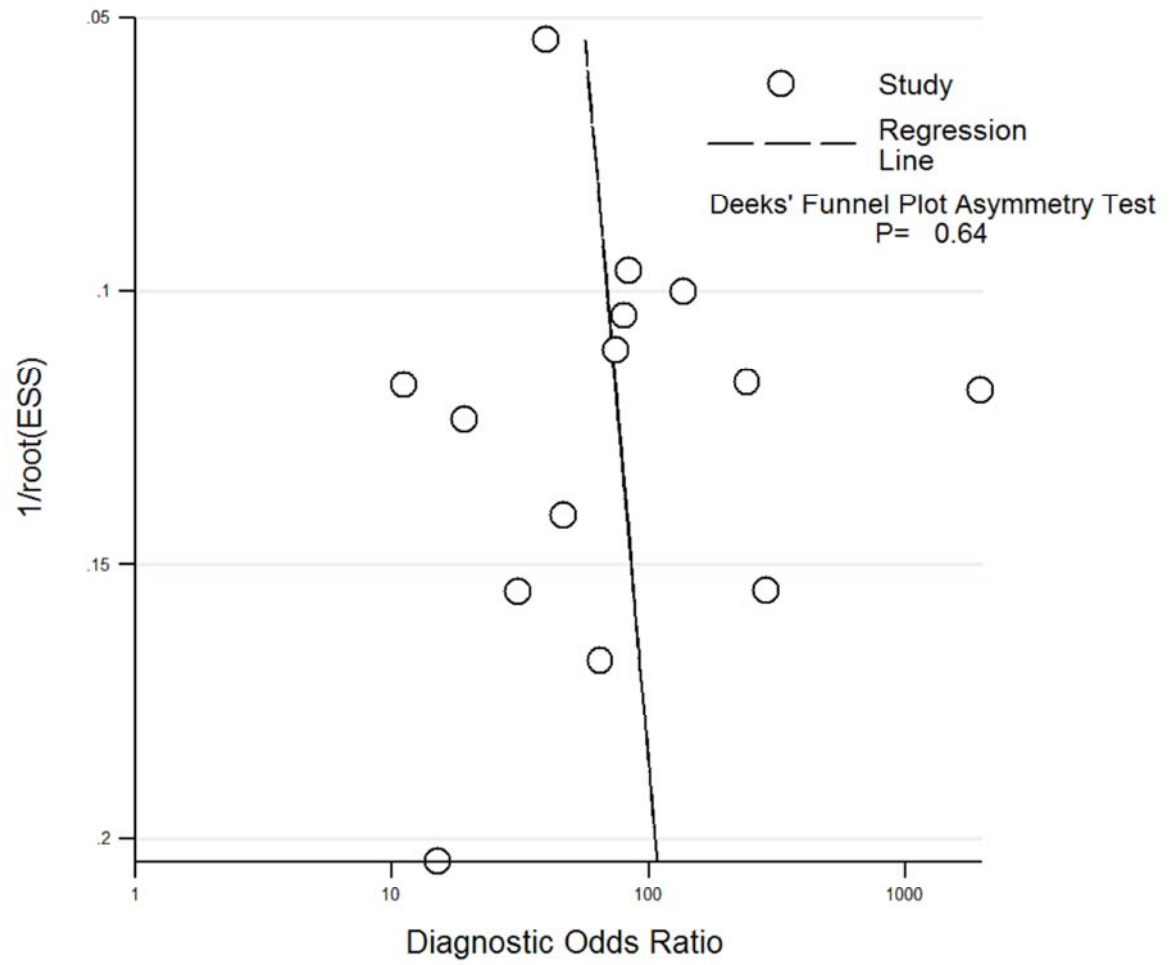

**FIG. S1** Funnel plots for included studies
